# Supplementary material for: Patient coaching: What do patients want? A mixed methods study in waiting rooms of outpatient clinics
Source: PLOS journal article supplement (doi:10.1371/journal.pone.0269677), 2022-06-09
Supplement: S1 (10.1371/journal.pone.0269677.s001) [file journal.pone.0269677.s001]

## Appendix I

### Questionnaire waiting room study

|                                     |
|-------------------------------------|
| Code:<br>Outpatient clinic<br>Date: |
|-------------------------------------|

*Below are some questions about your situation:*

#### **Question 1**

*are you:*

- ☐ *Male?*
- ☐ *Female?*

#### **Question 2**

*What is your age? .....*

#### **Question 3**

*Do you read and speak Dutch?*

- ☐ *Yes*
- ☐ *No*

#### **Question 4**

*Where do you currently live? .....*

#### **Question 5**

*Do you have a chronic illness? If so, what kind of chronic illness? (You may also indicate more, underline the most important ones for you):*

- ☐ *Yes, being .....*
- ☐ *No*

#### **Question 6**

*Who did you come here with?*

- ☐ *Alone*

- With my spouse
- With my child
- With my friend
- With a professional companion
- Other, being.....

### **Question 7**

*What is your highest level of education? (completed a study program with diploma or sufficient certificate)*

- No education (primary education: not completed) - primary education (primary school, special education)
- Primary or prepared vocational education (such as LTS, LEAO, LHNO, VMBO)
- Middle general secondary education (such as MAVO, (M) ULO, MBO short, VMBO-t)
- Secondary vocational education and vocational guidance education (such as MBO-long, MTS, MEAO, BOL, BBL, INAS)
- Higher general and pre-university education (such as HAVO, VWO, Atheneum, Gymnasium, HBS, MMS)
- Higher professional education (HBO, HTS, HEAO, HBO-V, Candidate university education)
- Scientific education (university)
- Other, being .....

*The following questions are about how you generally communicate with doctors as a patient.*

*For each question, please indicate how much confidence you have that you will be able to do this?*

*If you have no confidence at all, tick the leftmost box. The more confidence you have in it, the more to the right you tick the box.*

|                                                              | No confidence at all | Little confidence | Not much / not little | Fair confidence | Lots of confidence |
|--------------------------------------------------------------|----------------------|-------------------|-----------------------|-----------------|--------------------|
| 1. Know what questions to ask him / her?                     |                      |                   |                       |                 |                    |
| 2. Are you able to have him / her answer all your questions? |                      |                   |                       |                 |                    |

|                                                                                           |  |  |  |  |  |
|-------------------------------------------------------------------------------------------|--|--|--|--|--|
| 3. Make the most of the visit to him / her?                                               |  |  |  |  |  |
| 4. Are able to make him / her your most important health complaint to be taken seriously? |  |  |  |  |  |
| 5. Are you able to get him / her to do something about your main health complaint?        |  |  |  |  |  |

*Finally, whether you would be interested in a patient coach:*

### **Question 8**

*Would you need a coach?*

- Yes, why? ....
- No, why not?....

*If you answered “yes”, and if you are willing to participate in an interview, you may write your contact details at the bottom of the page. You will be contacted within 2 weeks for an interview.*

*If you answered “no”, would you please hand in the form at the return point at the desk or at one of us?*

*Thank you for completing this questionnaire.*

---

***I am willing to participate in an interview of approximately 1 hour, in a place that suits me. Prior to that, it is explained to me what the intention is. At that moment I can still decide not to participate.***

***I can be contacted using the information below:***

*Name:*

*Phone number:*

*Email:*
